# Supplementary material for: The Health-Related Quality of Life for Patients with Myalgic Encephalomyelitis / Chronic Fatigue Syndrome (ME/CFS)
Source: PubMed Central journal article supplement (PMC4492975; doi:10.1371/journal.pone.0132421), 2015-07-06
Supplement: pone.0132421.s001.pdf [file pone.0132421.s001.pdf]

**S1 File. Survey questions as published (Danish and English).**

**(Appendix 1)**

- Appendix 1a – survey questions as published (English translated version)
- Appendix 1b – survey questions as published (Danish original version)

## Appendix 1a – survey questions as published (English translated version)

### How to fill out the survey

First print out a questionnaire. Next, fill it, as described below.  
Once you have completed it, please send it to:

ME Foreningen, Rådhusstorvet 1, 1, 3520 Farum.

Please use a black or blue pen or thin marker.

The answers should be written so that all numbers and crosses should be easy to interpret as shown in the following examples:

|                                                                                             | CORRECT.                                                                | WRONG                                                                     |
|---------------------------------------------------------------------------------------------|-------------------------------------------------------------------------|---------------------------------------------------------------------------|
| Please set clear cross.                                                                     | <input type="checkbox"/> <input checked="" type="checkbox"/>            | <input type="checkbox"/> ✓ <input type="checkbox"/>                       |
| If a field is filled out incorrectly, shade the box and set a new cross in the correct box. | <input checked="" type="checkbox"/> <input checked="" type="checkbox"/> | <input checked="" type="checkbox"/> → <input checked="" type="checkbox"/> |
| Numbers are written within the fields of the box.                                           | <input type="checkbox"/> 1,2                                            | <input type="checkbox"/> 2                                                |
| Numbers are corrected by striking out the wrong number and write the correct number above.  | <input type="checkbox"/> 1, <del>2</del> <sup>4</sup>                   | <input type="checkbox"/> 1, <del>2</del> <sup>4</sup>                     |

## Quality of Life Survey - ME 2013

By placing a tick in one box in each group below, please indicate which statements best describe your own health state today.

### Mobility

- I have no problems in walking about
- I have some problems in walking about
- I am confined to bed

### Self-Care

- I have no problems with self-care
- I have some problems washing or dressing myself
- I am unable to wash or dress myself

### Usual Activities *(e.g. work, study, housework, family or leisure activities)*

- I have no problems with performing my usual activities
- I have some problems with performing my usual activities
- I am unable to perform my usual activities

### Pain/Discomfort

- I have no pain or discomfort
- I have moderate pain or discomfort
- I have extreme pain or discomfort

### Anxiety/Depression

- I am not anxious or depressed
- I am moderately anxious or depressed
- I am extremely anxious or depressed

To help people say how good or bad a health state is, we have drawn a scale (rather like a thermometer) on which the best state you can imagine is marked 100 and the worst state you can imagine is marked 0.

We would like you to indicate on this scale how good or bad your own health is today, in your opinion. Please do this by drawing a line from the box below to whichever point on the scale indicates how good or bad your health state is today.

**Your own  
health state  
today**

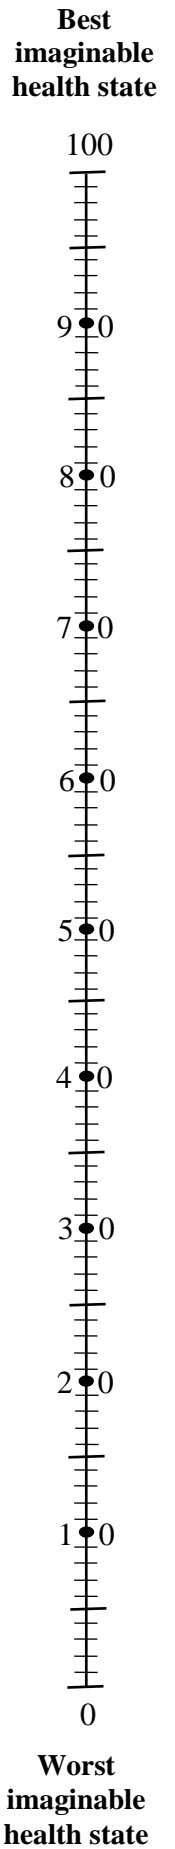

**Long-term illness and after-effects**

**Do you have any long-term illness, long-term after effects of injuries, disability or other long-term illness?**

*(Please only put one X)*

Yes .....  1

No .....  2

**For each of the following diseases and health problems, please indicate whether you have it now or have had it earlier. If you've had it before, please also indicate whether you have after effects.**

|                                                       | <i>(Only one X in every line)</i>       |                                    |                                             | <i>(Only one X in every line)</i>                                   |                            |
|-------------------------------------------------------|-----------------------------------------|------------------------------------|---------------------------------------------|---------------------------------------------------------------------|----------------------------|
|                                                       | <b>No, that I <u>never</u> have had</b> | <b>Yes, that I have <u>now</u></b> | <b>Yes, that I have had <u>previous</u></b> | <b>If you have had it earlier: Do you still have after effects?</b> |                            |
|                                                       |                                         |                                    |                                             | <b>Yes</b>                                                          | <b>No</b>                  |
| ME / CFS                                              | <input type="checkbox"/> 1              | <input type="checkbox"/> 2         | <input type="checkbox"/> 3                  | → <input type="checkbox"/> 1                                        | <input type="checkbox"/> 2 |
| Allergy (not asthma)                                  | <input type="checkbox"/> 1              | <input type="checkbox"/> 2         | <input type="checkbox"/> 3                  | → <input type="checkbox"/> 1                                        | <input type="checkbox"/> 2 |
| Diabetes                                              | <input type="checkbox"/> 1              | <input type="checkbox"/> 2         | <input type="checkbox"/> 3                  | → <input type="checkbox"/> 1                                        | <input type="checkbox"/> 2 |
| High blood pressure                                   | <input type="checkbox"/> 1              | <input type="checkbox"/> 2         | <input type="checkbox"/> 3                  | → <input type="checkbox"/> 1                                        | <input type="checkbox"/> 2 |
| Heart attack                                          | <input type="checkbox"/> 1              | <input type="checkbox"/> 2         | <input type="checkbox"/> 3                  | → <input type="checkbox"/> 1                                        | <input type="checkbox"/> 2 |
| Angina                                                | <input type="checkbox"/> 1              | <input type="checkbox"/> 2         | <input type="checkbox"/> 3                  | → <input type="checkbox"/> 1                                        | <input type="checkbox"/> 2 |
| Stroke                                                | <input type="checkbox"/> 1              | <input type="checkbox"/> 2         | <input type="checkbox"/> 3                  | → <input type="checkbox"/> 1                                        | <input type="checkbox"/> 2 |
| Chronic bronchitis, emphysema, COPD (emphysema, COPD) | <input type="checkbox"/> 1              | <input type="checkbox"/> 2         | <input type="checkbox"/> 3                  | → <input type="checkbox"/> 1                                        | <input type="checkbox"/> 2 |
| Osteoarthritis                                        | <input type="checkbox"/> 1              | <input type="checkbox"/> 2         | <input type="checkbox"/> 3                  | → <input type="checkbox"/> 1                                        | <input type="checkbox"/> 2 |
| Osteoarthritis                                        | <input type="checkbox"/> 1              | <input type="checkbox"/> 2         | <input type="checkbox"/> 3                  | → <input type="checkbox"/> 1                                        | <input type="checkbox"/> 2 |
| Osteoporosis                                          | <input type="checkbox"/> 1              | <input type="checkbox"/> 2         | <input type="checkbox"/> 3                  | → <input type="checkbox"/> 1                                        | <input type="checkbox"/> 2 |
| Cancer                                                | <input type="checkbox"/> 1              | <input type="checkbox"/> 2         | <input type="checkbox"/> 3                  | → <input type="checkbox"/> 1                                        | <input type="checkbox"/> 2 |
| Migraine or frequent headaches                        | <input type="checkbox"/> 1              | <input type="checkbox"/> 2         | <input type="checkbox"/> 3                  | → <input type="checkbox"/> 1                                        | <input type="checkbox"/> 2 |
| Short term mental illness                             | <input type="checkbox"/> 1              | <input type="checkbox"/> 2         | <input type="checkbox"/> 3                  | → <input type="checkbox"/> 1                                        | <input type="checkbox"/> 2 |

|                                              |                            |                            |                            |   |                            |                            |
|----------------------------------------------|----------------------------|----------------------------|----------------------------|---|----------------------------|----------------------------|
| (for example light depression or anxiety)    |                            |                            |                            |   |                            |                            |
| Long term mental illness or mental disorders | <input type="checkbox"/> 1 | <input type="checkbox"/> 2 | <input type="checkbox"/> 3 | → | <input type="checkbox"/> 1 | <input type="checkbox"/> 2 |
| Herniated or other back disorders            | <input type="checkbox"/> 1 | <input type="checkbox"/> 2 | <input type="checkbox"/> 3 | → | <input type="checkbox"/> 1 | <input type="checkbox"/> 2 |
| cataracts                                    | <input type="checkbox"/> 1 | <input type="checkbox"/> 2 | <input type="checkbox"/> 3 | → | <input type="checkbox"/> 1 | <input type="checkbox"/> 2 |
| Tinnitus                                     | <input type="checkbox"/> 1 | <input type="checkbox"/> 2 | <input type="checkbox"/> 3 | → | <input type="checkbox"/> 1 | <input type="checkbox"/> 2 |

**Such all in all ...**

All things considered - how satisfied or dissatisfied are you currently with life? (1 means very dissatisfied and 10 means very satisfied. 88 means "do not know")

*(Please only put one x)*

|                          |                          |                          |                          |                          |                          |                          |                          |                          |                          |                          |                          |
|--------------------------|--------------------------|--------------------------|--------------------------|--------------------------|--------------------------|--------------------------|--------------------------|--------------------------|--------------------------|--------------------------|--------------------------|
| <b>Very unsatisfied</b>  |                          |                          |                          |                          |                          |                          |                          |                          |                          | <b>Very satisfied</b>    | <b>Don't know</b>        |
| <input type="checkbox"/> | <input type="checkbox"/> | <input type="checkbox"/> | <input type="checkbox"/> | <input type="checkbox"/> | <input type="checkbox"/> | <input type="checkbox"/> | <input type="checkbox"/> | <input type="checkbox"/> | <input type="checkbox"/> | <input type="checkbox"/> | <input type="checkbox"/> |
| 1                        | 2                        | 3                        | 4                        | 5                        | 6                        | 7                        | 8                        | 9                        | 10                       | 88                       |                          |

**Personal relationships**

---

**Are you..?**

Man .....  1

Women.....  2

---

**What year were you born?**

Write year you were born:: 19

|

---

### In which Region do you live..?

- Capital Region .....  1
  - Region Zealand.....  2
  - Region of Southern Denmark.....  3
  - Central Denmark Region .....  4
  - North Denmark Region .....  5
- 

### Do you live alone or with others?

(You may put several X's)

- |                                                      |                            |
|------------------------------------------------------|----------------------------|
| I live alone                                         | <input type="checkbox"/> 1 |
| I live with my spouse or partner                     | <input type="checkbox"/> 2 |
| I live with my parents                               | <input type="checkbox"/> 3 |
| I live with a child / children <u>under</u> 16 years | <input type="checkbox"/> 4 |
| I live with young / young people (16-20 years)       | <input type="checkbox"/> 5 |
| live with other adults <b>above</b> 20 years         | <input type="checkbox"/> 6 |

### What education do you have?

*(Please only put one X)*

- |                                   |                            |
|-----------------------------------|----------------------------|
| Still goes to school              | <input type="checkbox"/> 1 |
| 7 or fewer years of schooling     | <input type="checkbox"/> 2 |
| 8-9 years of schooling            | <input type="checkbox"/> 3 |
| 10-11 years of schooling          | <input type="checkbox"/> 4 |
| Student, HF-exam (incl. HHX, HTX) | <input type="checkbox"/> 5 |
| Other (including foreign school)  | <input type="checkbox"/> 6 |

**Which school or youth education are you doing?**

*(Please only put one X)*

|                        |                            |
|------------------------|----------------------------|
| 9. grade               | <input type="checkbox"/> 1 |
| 10. grade              | <input type="checkbox"/> 2 |
| STX                    | <input type="checkbox"/> 3 |
| HTX                    | <input type="checkbox"/> 4 |
| HHX                    | <input type="checkbox"/> 5 |
| Trade school basic     | <input type="checkbox"/> 6 |
| EUD (technical school) | <input type="checkbox"/> 7 |
| HF                     | <input type="checkbox"/> 8 |
| Other                  | <input type="checkbox"/> 9 |

**Have you completed an education beyond basic school- or youth education?**

*(Please only put one X)*

|                                                                                                                                                                                 |                            |
|---------------------------------------------------------------------------------------------------------------------------------------------------------------------------------|----------------------------|
| No                                                                                                                                                                              | <input type="checkbox"/> 1 |
| One or more shorter courses (eg specialist worker training, labor rates, etc.)                                                                                                  | <input type="checkbox"/> 2 |
| Vocational education / skilled (eg, office or shop assistants, hairdressers, bricklayers, medical secretary, social and health / assistant, farmer)                             | <input type="checkbox"/> 3 |
| Short education, 2-3 years (eg, market economist, police officer, laboratory technician, mechanical engineer, computer science, multimedia, catering manager, dental hygienist) | <input type="checkbox"/> 4 |
| Medium education, 3-4 years (for example, school, social worker, building technician, nurse, physiotherapist, BSc, educator, bachelor)                                          | <input type="checkbox"/> 5 |
| Long higher education, more than 4 years (eg MSc, MA., Doctor, psychologist)                                                                                                    | <input type="checkbox"/> 6 |
| Other education                                                                                                                                                                 | <input type="checkbox"/> 7 |

**Are you within education?**

*(Please only put one X)*

- Yes .....  1
- No .....  2



**Are you employed?**

*(Please only put one X)*

- Yes .....  1
- No .....  2

*(Please only put one X)*

**Are you:**

- |                                         |                             |
|-----------------------------------------|-----------------------------|
| Age-related retirement                  | <input type="checkbox"/> 1  |
| Disability pensioner                    | <input type="checkbox"/> 2  |
| A different type of pension             | <input type="checkbox"/> 3  |
| Pre- retirement, transitional allowance | <input type="checkbox"/> 4  |
| Unemployment benefits (union)           | <input type="checkbox"/> 5  |
| Sickness benefit                        | <input type="checkbox"/> 6  |
| Long term sick (3 months. Or more)      | <input type="checkbox"/> 7  |
| Flex-job                                | <input type="checkbox"/> 8  |
| On social security, welfare             | <input type="checkbox"/> 9  |
| During rehabilitation                   | <input type="checkbox"/> 10 |
| Other                                   | <input type="checkbox"/> 11 |

*If other, please write what:*

\_\_\_\_\_

**You have now completed the study.  
Please submit your answer to:**

ME Foreningen

Rådhusstorvet 1, 1

35 20 Farum

---

ME Association thank you for your participation which is of great value to our contact with our health politicians.

Sincerely,  
Rebecca Hansen  
ME Association, Chairman.

## Appendix 1b – survey questions as published (Danish version)

### Sådan udfylder du skemaet

Først print spørgeskemaet ud. Dernæst udfyld det, som beskrevet nedenunder.

Når du har udfyldt det, så send det til:

ME Foreningen, Rådhusstorvet 1, 1, 3520 Farum.

Brug venligst en **sort** eller **blå kuglepen** eller **tynd filtpen**.

Svarene skal skrives ind, så alle tal og kryds skal være nemme at tolke som vist i nedenstående eksempler:

|                                                                                                        | RIGTIGT                                                                 | FORKERT                                                                   |
|--------------------------------------------------------------------------------------------------------|-------------------------------------------------------------------------|---------------------------------------------------------------------------|
| Sæt et tydeligt kryds.                                                                                 | <input type="checkbox"/> <input checked="" type="checkbox"/>            | <input type="checkbox"/> ✓ <input type="checkbox"/>                       |
| Hvis et felt er udfyldt forkert, skraveres den pågældende kasse og krydset sættes i den rigtige kasse. | <input checked="" type="checkbox"/> <input checked="" type="checkbox"/> | <input checked="" type="checkbox"/> → <input checked="" type="checkbox"/> |
| Tal skrives i felterne.                                                                                | <input type="checkbox"/> 1,2                                            | <input type="checkbox"/> 2                                                |
| Tal rettes ved helt at overstrege det forkerte tal og skrive det rigtige tal ovenover.                 | <input type="checkbox"/> <del>1,2</del> <sup>4</sup>                    | <input type="checkbox"/> <del>1,2</del> <sup>4</sup>                      |

## Livskvalitetsundersøgelse ME 2013

Angiv, ved at sætte kryds i én af kasserne i hver gruppe, hvilke udsagn, der bedst beskriver din helbredstilstand i dag.

### Bevægelighed

- Jeg har ingen problemer med at gå omkring  1
- Jeg har nogle problemer med at gå omkring  2
- Jeg er bundet til sengen  3

### Personlig pleje

- Jeg har ingen problemer med min personlige pleje  1
- Jeg har nogle problemer med at vaske mig eller klæde mig på  2
- Jeg kan ikke vaske mig eller klæde mig på  3

### Sædvanlige aktiviteter *(fx arbejde, studie, husarbejde, familie- eller fritidsaktiviteter)*

- Jeg har ingen problemer med at udføre mine sædvanlige aktiviteter  1
- Jeg har nogle problemer med at udføre mine sædvanlige aktiviteter  2
- Jeg kan ikke udføre mine sædvanlige aktiviteter  3

### Smerter/ubehag

- Jeg har ingen smerter eller ubehag  1
- Jeg har moderate smerter eller ubehag  2
- Jeg har ekstreme smerter eller ubehag  3

### Angst/depression

- Jeg er ikke ængstelig eller deprimeret  1
- Jeg er moderat ængstelig eller deprimeret  2
- Jeg er ekstremt ængstelig eller deprimeret  3

**Bedst  
tænkkelige  
helbredstilstand**

For at hjælpe folk med at sige, hvor god eller dårlig en helbredstilstand er, har vi tegnet en skala (næsten ligesom et termometer), hvor den bedste helbredstilstand du kan forestille dig er markeret med 100, og den værste helbredstilstand du kan forestille dig er markeret med 0.

Vi beder dig angive på denne skala, hvor god eller dårlig du mener din egen helbredstilstand er i dag. Angiv dette ved at tegne en streg fra kassen nedenfor til et hvilket som helst punkt på skalaen, der viser, hvor god eller dårlig din helbredstilstand er i dag.

**Din egen  
helbredstilstand**

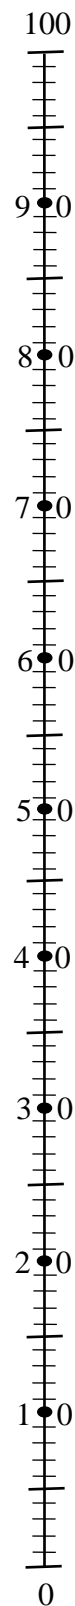

**Værst**

**tænkkelige  
helbredstilstand**

## Langvarige sygdomme og eftervirkninger

Har du nogen langvarig sygdom, langvarig eftervirkning af skade, handicap eller anden langvarig lidelse?

(Kun ét X)

Ja .....  1  
 Nej .....  2

For hver af de følgende sygdomme og helbredsproblemer bedes du angive, om du har den nu eller har haft den tidligere. Hvis du har haft den tidligere, bedes du også angive, om du har eftervirkninger.

|                                                                 | (Sæt ét X i hver linje)             |                            |                                       | (Sæt ét X i hver linje)                                        |                            |
|-----------------------------------------------------------------|-------------------------------------|----------------------------|---------------------------------------|----------------------------------------------------------------|----------------------------|
|                                                                 | Nej, det har jeg <u>aldrig</u> haft | Ja, det har jeg <u>nu</u>  | Ja, det har jeg haft <u>tidligere</u> | Hvis du har haft det tidligere: Har du stadig eftervirkninger? |                            |
|                                                                 |                                     |                            |                                       | Ja                                                             | Nej                        |
| ME / CFS                                                        | <input type="checkbox"/> 1          | <input type="checkbox"/> 2 | <input type="checkbox"/> 3            | → <input type="checkbox"/> 1                                   | <input type="checkbox"/> 2 |
| Allergi (ikke astma)                                            | <input type="checkbox"/> 1          | <input type="checkbox"/> 2 | <input type="checkbox"/> 3            | → <input type="checkbox"/> 1                                   | <input type="checkbox"/> 2 |
| Sukkersyge (diabetes)                                           | <input type="checkbox"/> 1          | <input type="checkbox"/> 2 | <input type="checkbox"/> 3            | → <input type="checkbox"/> 1                                   | <input type="checkbox"/> 2 |
| Forhøjet blodtryk                                               | <input type="checkbox"/> 1          | <input type="checkbox"/> 2 | <input type="checkbox"/> 3            | → <input type="checkbox"/> 1                                   | <input type="checkbox"/> 2 |
| Blodprop i hjertet                                              | <input type="checkbox"/> 1          | <input type="checkbox"/> 2 | <input type="checkbox"/> 3            | → <input type="checkbox"/> 1                                   | <input type="checkbox"/> 2 |
| Hjertekrampe                                                    | <input type="checkbox"/> 1          | <input type="checkbox"/> 2 | <input type="checkbox"/> 3            | → <input type="checkbox"/> 1                                   | <input type="checkbox"/> 2 |
| Hjerneblødning, blodprop i hjernen                              | <input type="checkbox"/> 1          | <input type="checkbox"/> 2 | <input type="checkbox"/> 3            | → <input type="checkbox"/> 1                                   | <input type="checkbox"/> 2 |
| Kronisk bronkitis, for store lunger, rygerlunger (emfysem, KOL) | <input type="checkbox"/> 1          | <input type="checkbox"/> 2 | <input type="checkbox"/> 3            | → <input type="checkbox"/> 1                                   | <input type="checkbox"/> 2 |
| Slidgigt                                                        | <input type="checkbox"/> 1          | <input type="checkbox"/> 2 | <input type="checkbox"/> 3            | → <input type="checkbox"/> 1                                   | <input type="checkbox"/> 2 |
| Leddegigt                                                       | <input type="checkbox"/> 1          | <input type="checkbox"/> 2 | <input type="checkbox"/> 3            | → <input type="checkbox"/> 1                                   | <input type="checkbox"/> 2 |
| Knogleskørhed (osteoporose)                                     | <input type="checkbox"/> 1          | <input type="checkbox"/> 2 | <input type="checkbox"/> 3            | → <input type="checkbox"/> 1                                   | <input type="checkbox"/> 2 |
| Kræft                                                           | <input type="checkbox"/> 1          | <input type="checkbox"/> 2 | <input type="checkbox"/> 3            | → <input type="checkbox"/> 1                                   | <input type="checkbox"/> 2 |
| Migræne eller hyppig hovedpine                                  | <input type="checkbox"/> 1          | <input type="checkbox"/> 2 | <input type="checkbox"/> 3            | → <input type="checkbox"/> 1                                   | <input type="checkbox"/> 2 |
| Forbigående psykisk lidelse (f.eks. let depression eller angst) | <input type="checkbox"/> 1          | <input type="checkbox"/> 2 | <input type="checkbox"/> 3            | → <input type="checkbox"/> 1                                   | <input type="checkbox"/> 2 |

|                                                       |                            |                            |                            |   |                            |                            |
|-------------------------------------------------------|----------------------------|----------------------------|----------------------------|---|----------------------------|----------------------------|
| Vedvarende psykisk sygdom eller mentale forstyrrelser | <input type="checkbox"/> 1 | <input type="checkbox"/> 2 | <input type="checkbox"/> 3 | → | <input type="checkbox"/> 1 | <input type="checkbox"/> 2 |
| Diskusprolaps eller andre rygsygdomme                 | <input type="checkbox"/> 1 | <input type="checkbox"/> 2 | <input type="checkbox"/> 3 | → | <input type="checkbox"/> 1 | <input type="checkbox"/> 2 |
| Grå stær                                              | <input type="checkbox"/> 1 | <input type="checkbox"/> 2 | <input type="checkbox"/> 3 | → | <input type="checkbox"/> 1 | <input type="checkbox"/> 2 |
| Tinnitus                                              | <input type="checkbox"/> 1 | <input type="checkbox"/> 2 | <input type="checkbox"/> 3 | → | <input type="checkbox"/> 1 | <input type="checkbox"/> 2 |

**Sådan alt i alt...**

**Alt taget i betragtning - hvor tilfreds eller utilfreds er du for tiden med livet?** (1 betyder meget utilfreds og 10 betyder meget tilfreds. 88 betyder "ved ikke")

(Sæt kun ét X)

| Meget utilfreds          |                          |                          |                          |                          | Meget Ved Tilfreds ikke  |                          |                          |                          |                          |                          |
|--------------------------|--------------------------|--------------------------|--------------------------|--------------------------|--------------------------|--------------------------|--------------------------|--------------------------|--------------------------|--------------------------|
| <input type="checkbox"/> | <input type="checkbox"/> | <input type="checkbox"/> | <input type="checkbox"/> | <input type="checkbox"/> | <input type="checkbox"/> | <input type="checkbox"/> | <input type="checkbox"/> | <input type="checkbox"/> | <input type="checkbox"/> | <input type="checkbox"/> |
| 1                        | 2                        | 3                        | 4                        | 5                        | 6                        | 7                        | 8                        | 9                        | 10                       | 88                       |

**Personlige forhold**

**Er du..?**

Mand .....  1

Kvinde.....  2

**Hvilket år er du født?**

Skriv år du er født: 19

**I hvilken Region bor du..?**

Region Hovedstaden .....  1

Region Sjælland.....  2

- Region Syddanmark .....  3
- Region Midtjylland .....  4
- Region Nordjylland .....  5
- 

### Bor du alene eller sammen med andre?

(Sæt gerne flere X'er)

|                                                   | (Kun ét X)                 |
|---------------------------------------------------|----------------------------|
| Jeg bor alene                                     | <input type="checkbox"/> 1 |
| Jeg bor sammen med ægtefælle eller samlever       | <input type="checkbox"/> 2 |
| Jeg bor sammen med forældre                       | <input type="checkbox"/> 3 |
| Jeg bor sammen med barn/børn <b>under</b> 16 år   | <input type="checkbox"/> 4 |
| Jeg bor sammen med ung/unge (16-20 år)            | <input type="checkbox"/> 5 |
| Jeg bor sammen med andre voksne <b>over</b> 20 år | <input type="checkbox"/> 6 |

### Hvilken skoleuddannelse har du?

|                                      | (Kun ét x)                 |
|--------------------------------------|----------------------------|
| Går stadig i skole                   | <input type="checkbox"/> 1 |
| 7 eller færre års skolegang          | <input type="checkbox"/> 2 |
| 8-9 års skolegang                    | <input type="checkbox"/> 3 |
| 10-11 års skolegang                  | <input type="checkbox"/> 4 |
| Studer-, HF-eksamen (inkl. HHX, HTX) | <input type="checkbox"/> 5 |
| Andet (herunder udenlandsk skole)    | <input type="checkbox"/> 6 |

### Hvilken skole- eller ungdomsuddannelse er du i gang med?

(Kun ét X)

|            | (Kun ét x)                 |
|------------|----------------------------|
| 9. klasse  | <input type="checkbox"/> 1 |
| 10. klasse | <input type="checkbox"/> 2 |
| STX        | <input type="checkbox"/> 3 |
| HTX        | <input type="checkbox"/> 4 |



|                                |                            |
|--------------------------------|----------------------------|
| HHX                            | <input type="checkbox"/> 5 |
| Handelsskolens grunduddannelse | <input type="checkbox"/> 6 |
| EUD (teknisk skole)            | <input type="checkbox"/> 7 |
| HF                             | <input type="checkbox"/> 8 |
| Andet                          | <input type="checkbox"/> 9 |

**Har du fuldført en uddannelse udover en skole- eller ungdomsuddannelse?**

*(Kun ét x)*

|                                                                                                                                                                       |                            |
|-----------------------------------------------------------------------------------------------------------------------------------------------------------------------|----------------------------|
| Nej                                                                                                                                                                   | <input type="checkbox"/> 1 |
| Et eller flere kortere kurser (fx specialarbejderkurser, arbejdsmarkedskurser m.v.)                                                                                   | <input type="checkbox"/> 2 |
| Erhvervsfaglig uddannelse/faglært (fx kontor- eller butiksassistent, frisør, murer, lægesekretær, social- og sundhedshjælper/assistent, landmand)                     | <input type="checkbox"/> 3 |
| Kort videregående uddannelse, 2-3 år (fx markedsøkonom, politibetjent, laborant, maskintekniker, datamatiker, multimediedesigner, økonoma, tandplejer)                | <input type="checkbox"/> 4 |
| Mellemlang videregående uddannelse, 3-4 år (fx folkeskolelærer, socialrådgiver, bygningskonstruktør, sygeplejerske, fysioterapeut, diplomingeniør, pædagog, bachelor) | <input type="checkbox"/> 5 |
| Lang videregående uddannelse, mere end 4 år (fx civilingeniør, cand.mag., læge, psykolog)                                                                             | <input type="checkbox"/> 6 |
| Anden uddannelse                                                                                                                                                      | <input type="checkbox"/> 7 |

**Er du under uddannelse?**

- Ja .....  1
- Nej .....  2

**Er du i arbejde?**

- Ja .....  1
- Nej .....  2

*Sæt kun 1 kryds:*

|                                    |                            |
|------------------------------------|----------------------------|
| <b>Er du:</b>                      |                            |
| Alderspensionist                   | <input type="checkbox"/> 1 |
| Førtidspensionist                  | <input type="checkbox"/> 2 |
| Anden form for pension             | <input type="checkbox"/> 3 |
| Efterlønsmodtager, overgangsydelse | <input type="checkbox"/> 4 |

|                                 |                             |
|---------------------------------|-----------------------------|
| Dagpenge                        | <input type="checkbox"/> 5  |
| Sygedagpenge                    | <input type="checkbox"/> 6  |
| Langtidssyg (3 mdr. eller mere) | <input type="checkbox"/> 7  |
| Fleskjob                        | <input type="checkbox"/> 8  |
| På kontanthjælp, bistandshjælp  | <input type="checkbox"/> 9  |
| Under revalidering              | <input type="checkbox"/> 10 |
| Andet                           | <input type="checkbox"/> 11 |
| <i>Hvis andet, skriv hvad:</i>  |                             |
| <hr/>                           |                             |
| <hr/>                           |                             |

**Du har nu afsluttet undersøgelsen.**

Du bedes indsende din besvarelse til

ME Foreningen

Rådhusstorvet 1, 1

35 20 Farum

---

ME Foreningen takker for din deltagelse som er af stor værdi for vores kontakt til bl.a. sundhedspolitikere.

Med venlig hilsen

Rebecca Hansen

ME Foreningen, formand.

## Appendix 2. Frequencies data-extraction of ME/CFS hospital treated patients from 1994-2013, ICD-10 code G93.3 based on a Danish full population and sample data

Full Population yearly incidence for diagnosis code G93.3 (ME/CFS)

| <b>year</b> | <b>Frequency</b> | <b>Cumulative Frequency</b> |
|-------------|------------------|-----------------------------|
| 1994        | 44               | 44                          |
| 1995        | 46               | 90                          |
| 1996        | 46               | 136                         |
| 1997        | 63               | 199                         |
| 1998        | 53               | 252                         |
| 1999        | 40               | 292                         |
| 2000        | 27               | 319                         |
| 2001        | 24               | 343                         |
| 2002        | 37               | 380                         |
| 2003        | 43               | 423                         |
| 2004        | 43               | 466                         |
| 2005        | 30               | 496                         |
| 2006        | 32               | 528                         |
| 2007        | 27               | 555                         |
| 2008        | 26               | 581                         |
| 2009        | 31               | 612                         |
| 2010        | 24               | 636                         |
| 2011        | 30               | 666                         |
| 2012        | 35               | 701                         |
| 2013        | 44               | 745                         |

Only respondents of the North Denmark Health Survey sample of 2010, merged with hospital data, yearly incidence for diagnosis code G93.3:

| <b>year</b> | <b>Frequency</b> | <b>Cumulative Frequency</b> |
|-------------|------------------|-----------------------------|
| <b>1998</b> | 2                | 2                           |
| <b>2005</b> | 1                | 3                           |

Source: The Danish National Patient Register, data extracted from Statistics Denmark Researcher Servers.
