# Supplementary material for: The Health-Related Quality of Life for Patients with Myalgic Encephalomyelitis / Chronic Fatigue Syndrome (ME/CFS)
Source: PubMed Central journal article supplement (PMC4492975; doi:10.1371/journal.pone.0132421), 2015-07-06
Supplement: pone.0132421.s004.pdf [file pone.0132421.s004.pdf]

**S1 Table. Data-extracted frequencies of ME/CFS hospital treated patients from 1994-2013, ICD-10 code G93.3 based on a Danish full population and sample data. (Appendix 2.)**

Full Population yearly incidence for diagnosis code G93.3 (ME/CFS)

| <b>year</b> | <b>Frequency</b> | <b>Cumulative Frequency</b> |
|-------------|------------------|-----------------------------|
| 1994        | 44               | 44                          |
| 1995        | 46               | 90                          |
| 1996        | 46               | 136                         |
| 1997        | 63               | 199                         |
| 1998        | 53               | 252                         |
| 1999        | 40               | 292                         |
| 2000        | 27               | 319                         |
| 2001        | 24               | 343                         |
| 2002        | 37               | 380                         |
| 2003        | 43               | 423                         |
| 2004        | 43               | 466                         |
| 2005        | 30               | 496                         |
| 2006        | 32               | 528                         |
| 2007        | 27               | 555                         |
| 2008        | 26               | 581                         |
| 2009        | 31               | 612                         |
| 2010        | 24               | 636                         |
| 2011        | 30               | 666                         |
| 2012        | 35               | 701                         |
| 2013        | 44               | 745                         |

Only respondents of the North Denmark Health Survey sample of 2010, merged with hospital data, yearly incidence for diagnosis code G93.3:

| <b>year</b> | <b>Frequency</b> | <b>Cumulative<br/>Frequency</b> |
|-------------|------------------|---------------------------------|
| <b>1998</b> | 2                | 2                               |
| <b>2005</b> | 1                | 3                               |

Source: The Danish National Patient Register, data extracted from Statistics Denmark Researcher Servers.
