# Supplementary material for: The Health-Related Quality of Life for Patients with Myalgic Encephalomyelitis / Chronic Fatigue Syndrome (ME/CFS)
Source: PubMed Central journal article supplement (PMC4492975; doi:10.1371/journal.pone.0132421), 2015-07-06
Supplement: pone.0132421.s005.pdf [file pone.0132421.s005.pdf]

## S2 Table.

Mean of ME/CFS with and without mental conditions excluded. Complete cases.

|                                              | Mean  | Std. Err. | [95% Conf. Interval] | n   |
|----------------------------------------------|-------|-----------|----------------------|-----|
| Sample I – ME/CFS with mental conditions     | 0.469 | 0.031     | [0.407 - 0.530]      | 103 |
| Sample II – ME/CFS without mental conditions | 0.509 | 0.033     | [0.444 - 0.575]      | 79  |

---

### Two-sample t test with equal variances\*

---

| Group    | Obs | Mean       | Std. Err. | Std. Dev. | [95% Conf. Interval]     |
|----------|-----|------------|-----------|-----------|--------------------------|
| 1        | 103 | 0.4687379  | 0.0313283 | 0.3179472 | [0.4065984 ; 0.5308773]  |
| 2        | 79  | 0.5095696  | 0.0326525 | 0.2902219 | [0.4445635 ; 0.5745758]  |
| combined | 182 | 0.4864615  | 0.0226872 | 0.3060676 | [0.4416961 ; 0.531227]   |
| diff     |     | -0.0408318 | 0.0458002 |           | [-0.1312061 ; 0.0495426] |

diff = mean(1) - mean(2)                      t = -0.8915

Ho: diff = 0                                      degrees of freedom = 180

Ha: diff < 0              Ha: diff != 0              Ha: diff > 0

Pr(T < t) = 0.1869      Pr(|T| > |t|) = 0.3738      Pr(T > t) = 0.8131

---

\* NOTE: since the two samples are overlapping and not independent, the ttest is not an optimal test of mean difference, since the assumption of independence is violated. However, to the authors' knowledge, there is no consensus of which test is the best to apply in this case.
